# Supplementary material for: Surface coating determines the inflammatory potential of magnetite nanoparticles in murine renal podocytes and mesangial cells
Source: PubMed Central journal article supplement — RSC Adv. 2020 Jun 23;10(40):23916–29. doi: 10.1039/d0ra03133j (PMC9055089; doi:10.1039/d0ra03133j), 2020-06-23
Supplement: RA-010-D0RA03133J-s001.pdf [file RA-010-D0RA03133J-s001.pdf]

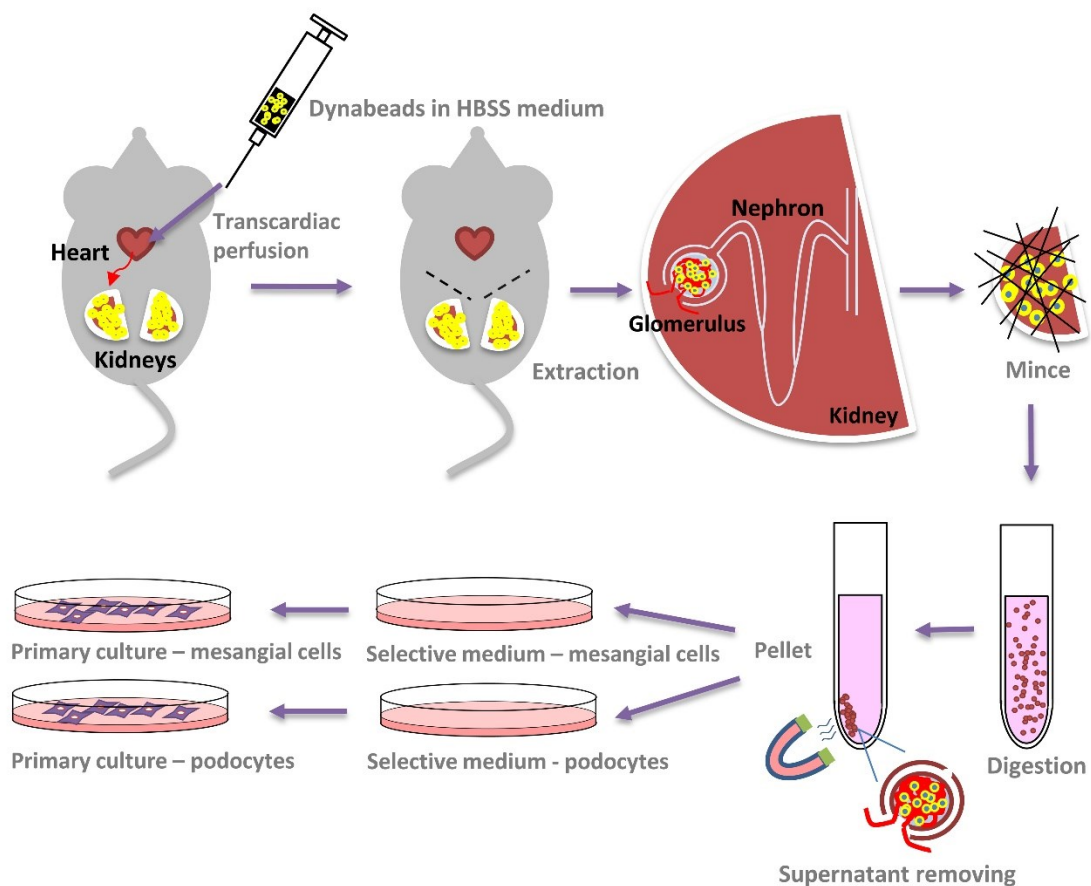

**Supplemental Figure S1 Isolation of primary mesangial cells and podocytes from mouse kidney.** Transcardiac perfusion of HBSS medium containing  $8 \times 10^7$  inactivated Dynabeads serves to enrich Dynabeads in kidney glomeruli. Following extraction, kidneys are minced into  $1 \text{ mm}^3$  pieces and subsequently digested with  $1 \text{ mg/ml}$  collagenase A at  $37^\circ\text{C}$  for 30 minutes. Being gently pressed through a  $100 \mu\text{m}$  cell strainer, the cell suspension is centrifuged at  $200 \times g$  for 5 minutes and cell pellet resuspended in 5 ml of HBSS. Glomeruli containing Dynabeads are gathered using magnetic particle concentrator. After washing with HBSS, glomeruli are cultured in cell-specific media.

Supplemental figure S1

## PODOCYTES

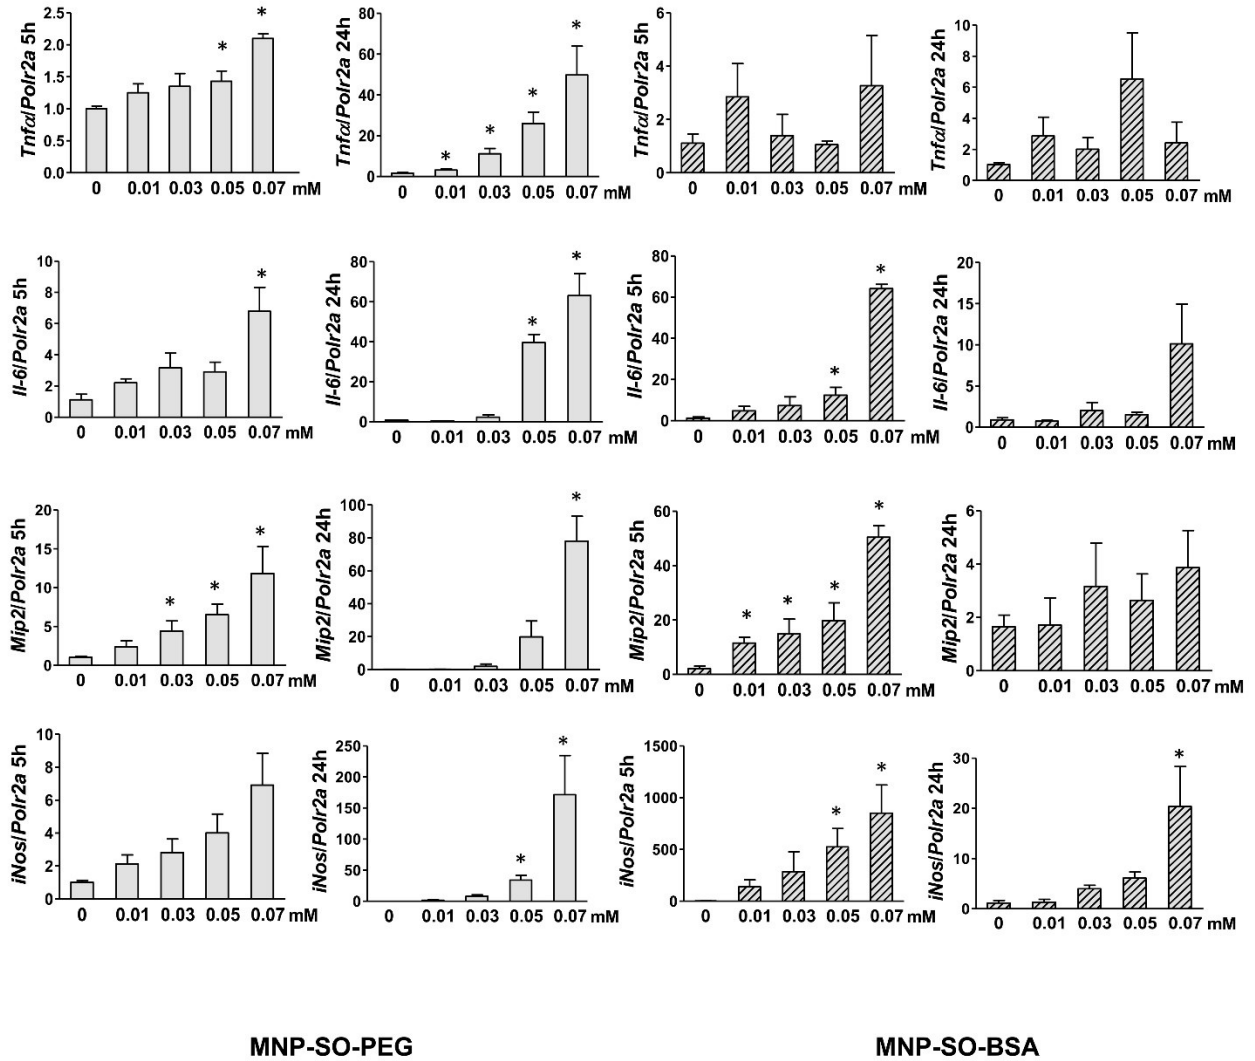

**Supplemental Figure S2 MNPs induce intensive inflammatory response in murine podocytes.** RT-PCR for *Tnfa*, *Il-6*, *Mip2*, and *iNos* after the short (5 h) and long (24 h) time exposure to indicated concentrations of MNP-SO-PEG (A) and MNP-SO-BSA (B). Data represent the mean  $\pm$  SEM of three independent experiments. \* $P < 0.05$  vs. corresponding non-exposed control.

## MESANGIAL CELLS

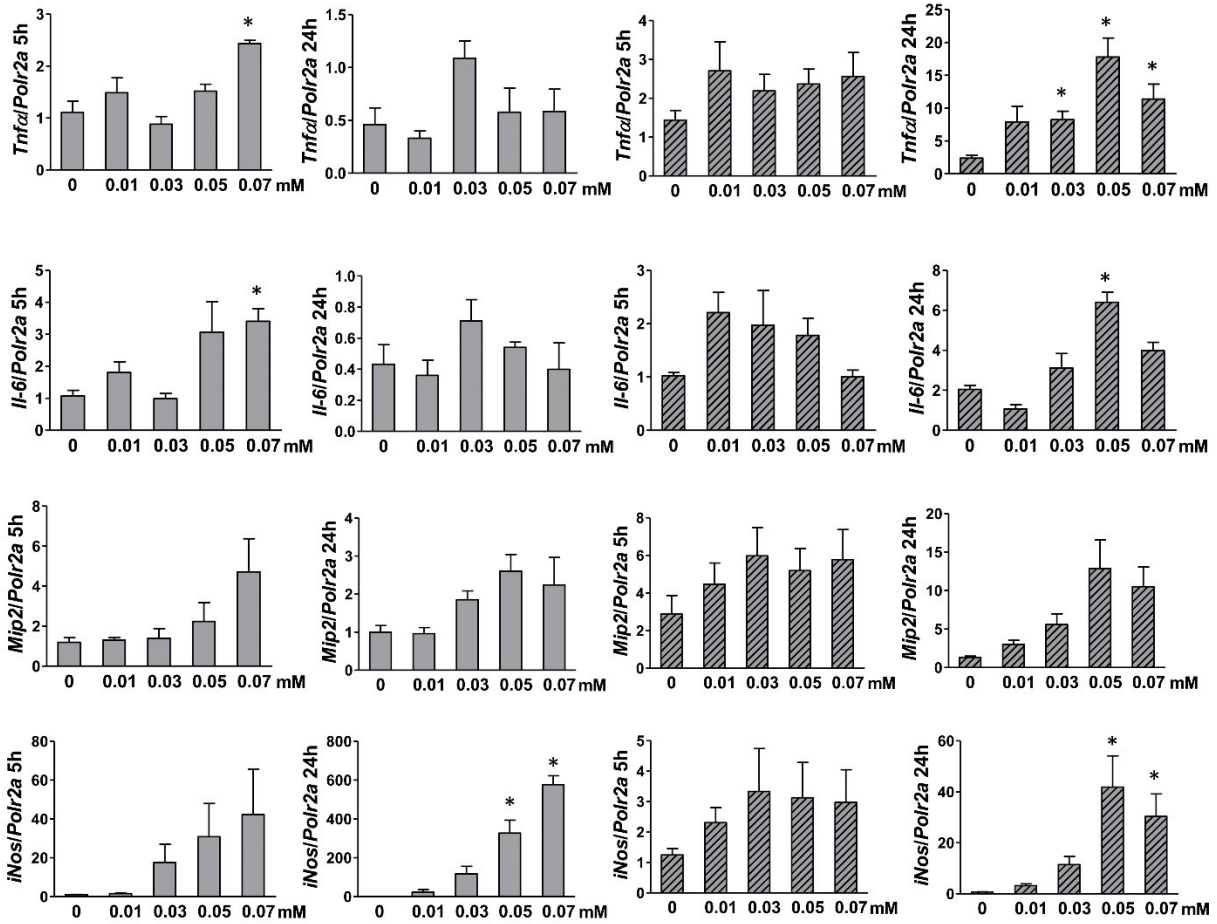

MNP-SO-PEG

MNP-SO-BSA

**Supplemental Figure S3** MNPs induce moderate inflammatory response in murine mesangial cells. RT-PCR for *Tnfa*, *Il-6*, *Mip2*, and *iNos* after the short (5 h) and long (24 h) time exposure to indicated concentrations of MNP-SO-PEG (A) and MNP-SO-BSA (B). Data represent the mean  $\pm$  SEM of three independent experiments. \* $P < 0.05$  vs. corresponding non-exposed control.

Supplemental figure S3
